# Supplementary material
Source: Royal Society of Chemistry journal article supplement (doi:10.1039/d6ta01751g)
Supplement: d6ta01751g1.pdf [file d6ta01751g1.pdf]

## Supporting information

### ***In-situ* Polymerization of Dicationic Pyrrolidinium-based Solid Polymer Electrolyte for High Performing and Long-Lasting Lithium-Ion Battery**

Sonali R. Kakade<sup>1</sup>, Yogita R. Thorat<sup>1</sup>, Rushikesh B. Kale<sup>1</sup>, Ramchandra S. Kalubarme<sup>1</sup>,  
Bharat B. Kale<sup>2</sup>, Nageshwar D. Khupse\*<sup>1</sup>, Milind V. Kulkarni\*<sup>1</sup>

<sup>1</sup> Centre for Materials for Electronics Technology (C-MET), Ministry of Electronics and Information Technology (MeitY), Government of India, Pune, 411008 INDIA

<sup>2</sup> Pimpri Chinchwad University (PCU), Mohitewadi Rd, Mohitewadi, Pune, 412106, INDIA

Email: [milindkemet@gmail.com](mailto:milindkemet@gmail.com); [nageshkhupse@gmail.com](mailto:nageshkhupse@gmail.com)

**Table S1:** Abbreviated forms of the DILs

| Sr. No | Abbreviations                                             | Name of Ionic Liquids                                                                  | Structures                                                                            |
|--------|-----------------------------------------------------------|----------------------------------------------------------------------------------------|---------------------------------------------------------------------------------------|
| 1      | [C <sub>3</sub> (pyr) <sub>2</sub> ] [TFSI] <sub>2</sub>  | 1,3-Bis (1-methyl pyrrolidinium 1-yl) propane bis (trifluoro methyl sulfonyl) imide    | 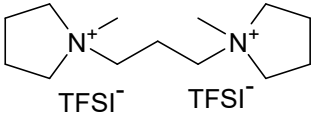 |
| 2      | [C <sub>6</sub> (pyr) <sub>2</sub> ] [TFSI] <sub>2</sub>  | 1,6-Bis (1- methyl pyrrolidinium 1-yl) hexane bis (trifluoro methyl sulfonyl) imide    |   |
| 3      | [C <sub>9</sub> (pyr) <sub>2</sub> ] [TFSI] <sub>2</sub>  | 1,9-Bis (1- methyl pyrrolidinium 1-yl) nonane bis (trifluoro methyl sulfonyl) imide    |   |
| 4      | [C <sub>12</sub> (pyr) <sub>2</sub> ] [TFSI] <sub>2</sub> | 1,12-Bis (1- methyl pyrrolidinium 1-yl) dodecane bis (trifluoro methyl sulfonyl) imide |   |

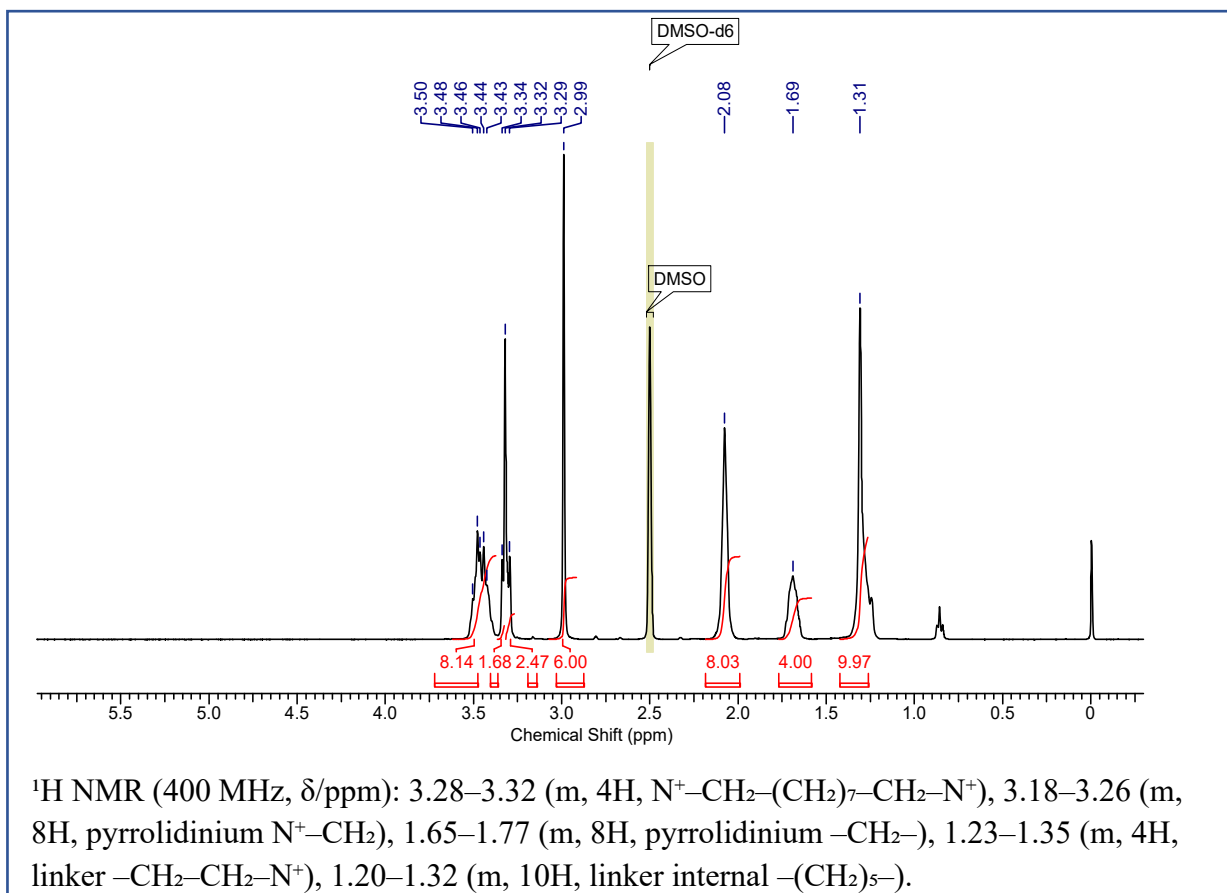

**Figure S1:**  $^1\text{H}$  NMR spectrum of the synthesized dicationic ionic liquid  $[\text{C}_9(\text{pyr})_2][\text{TFSI}]_2$  recorded in  $\text{DMSO}-d_6$  as the solvent.

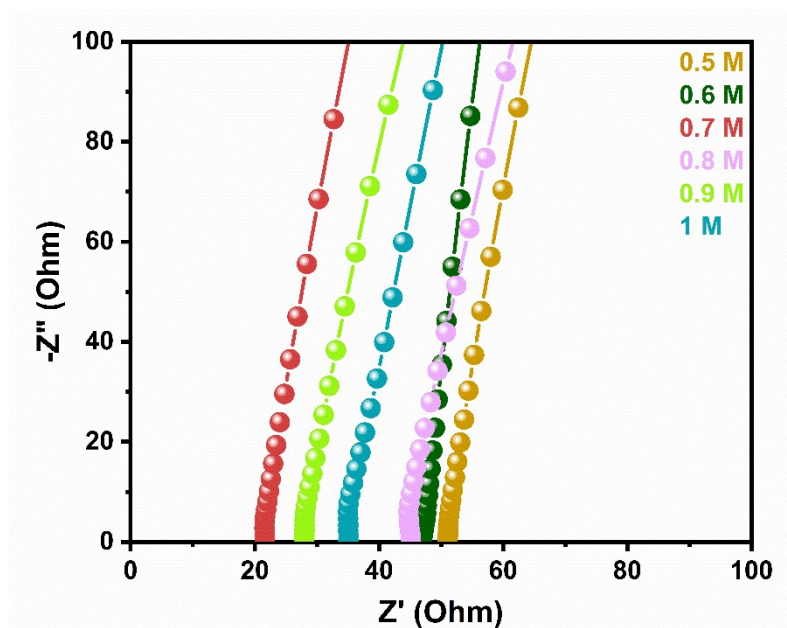

**Figure S2:** Electrochemical impedance spectroscopy (EIS) Nyquist plots of LITFSI-DIL electrolyte with varying salt concentration (0.5M-1.0M).

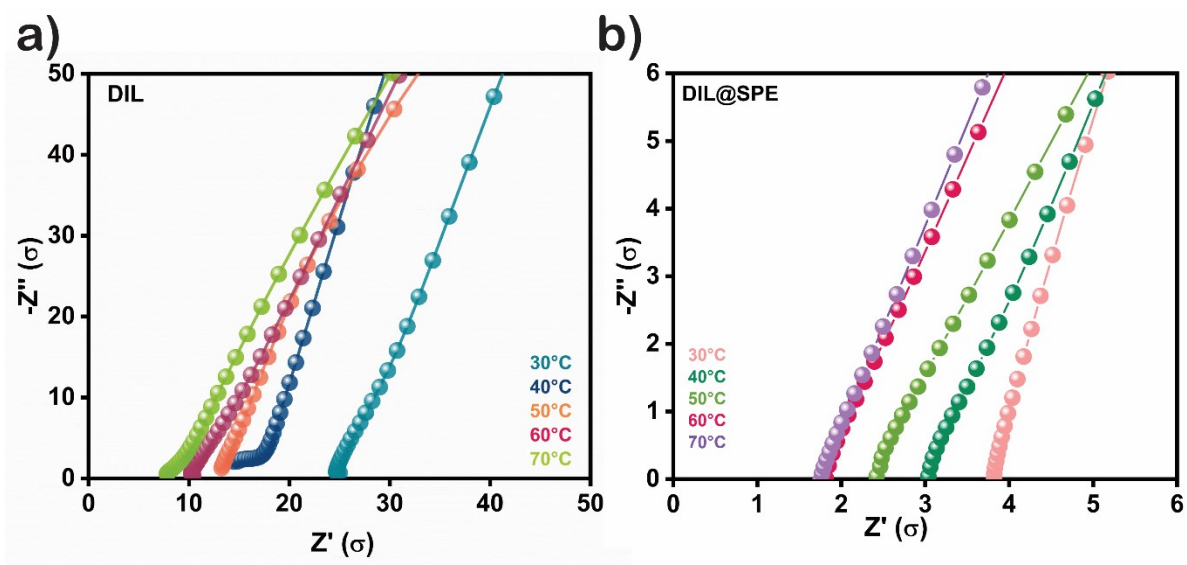

**Figure S3:** Temperature-dependent electrochemical impedance spectroscopy (EIS) Nyquist plots of a) DIL and b) DIL@SPE systems measured in the temperature range of 30-70 °C.

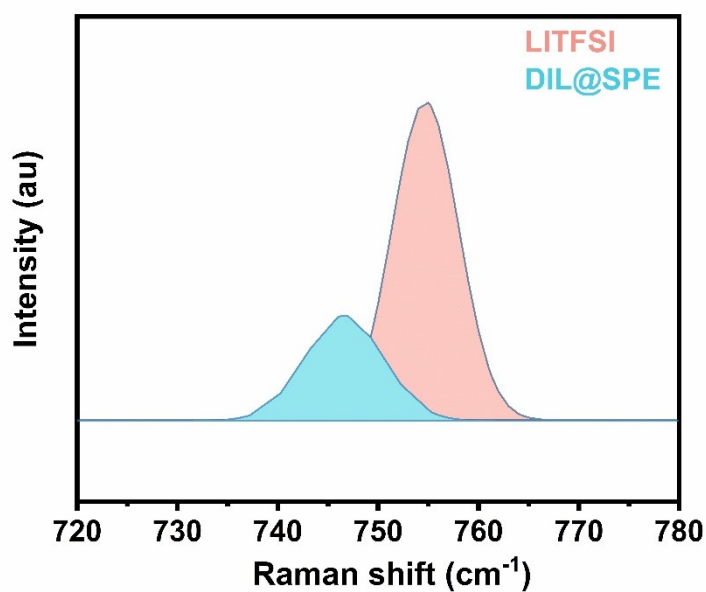

**Figure S4:** Raman spectra of pure LiTFSI and the DIL@SPE electrolyte

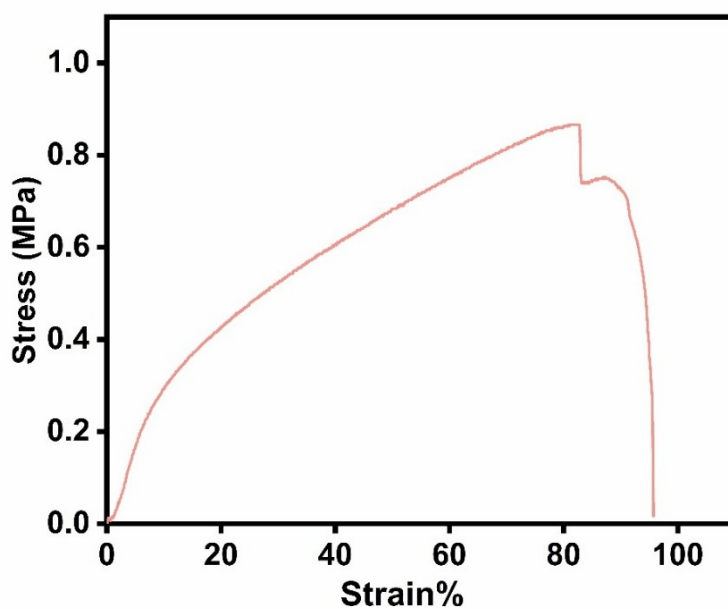

**Figure S5:** Tensile stress-strain curves of the solid polymer electrolyte membranes obtained from mechanical testing

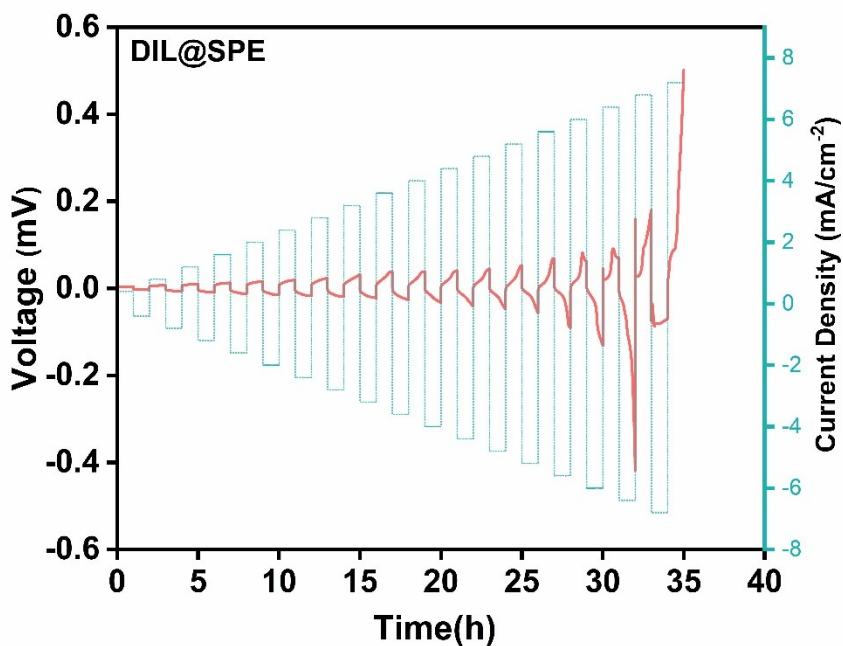

**Figure S6:** Critical current density (CCD) test of the symmetric Li|DIL@SPE|Li at 30 °C.

**TableS2:** HOMO, LUMO, and Chemical Hardness ( $\eta$ )

| Molecule | HOMO(eV) | LUMO(eV) | Energy Gap(eV) | Chemical hardness $\eta$ (eV) | Interpretation                   |
|----------|----------|----------|----------------|-------------------------------|----------------------------------|
| LiTFSI   | -8.91    | -1.708   | 7.202          | 3.60                          | Reactive; SEI formation          |
| VEC      | -8.135   | -1.024   | 7.111          | 3.56                          | Moderately reactive              |
| ETPTA    | -7.083   | -1.756   | 5.327          | 2.66                          | Crosslinker, good reactivity     |
| DIL      | -6.609   | -0.284   | 6.325          | 3.16                          | Stable, electrochemically robust |

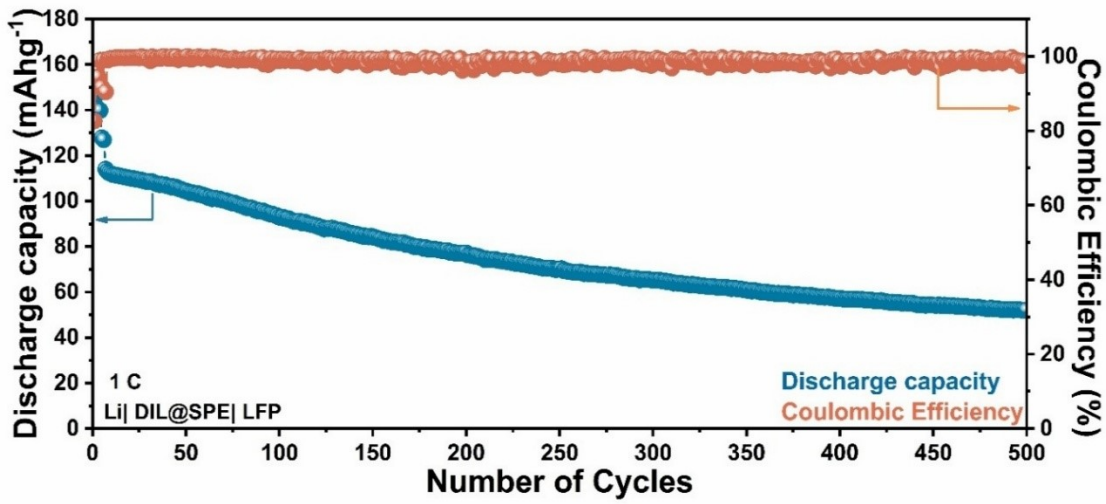

**Figure S7:** Long-term cycling performance of the LFP|DIL@SPE|Li cell at a 1C rate

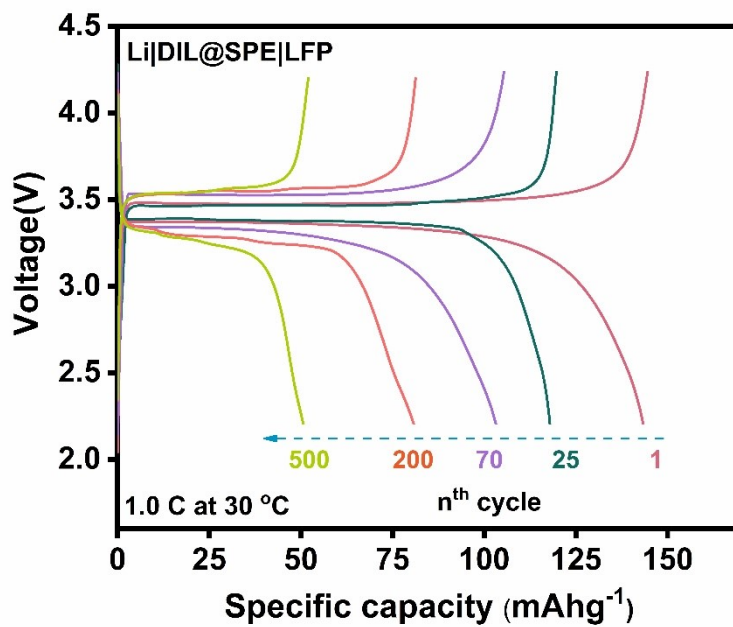

**Figure S8:** Galvanostatic charge-discharge profile of the LFP|DIL@SPE|Li cell various cycles at 1C.

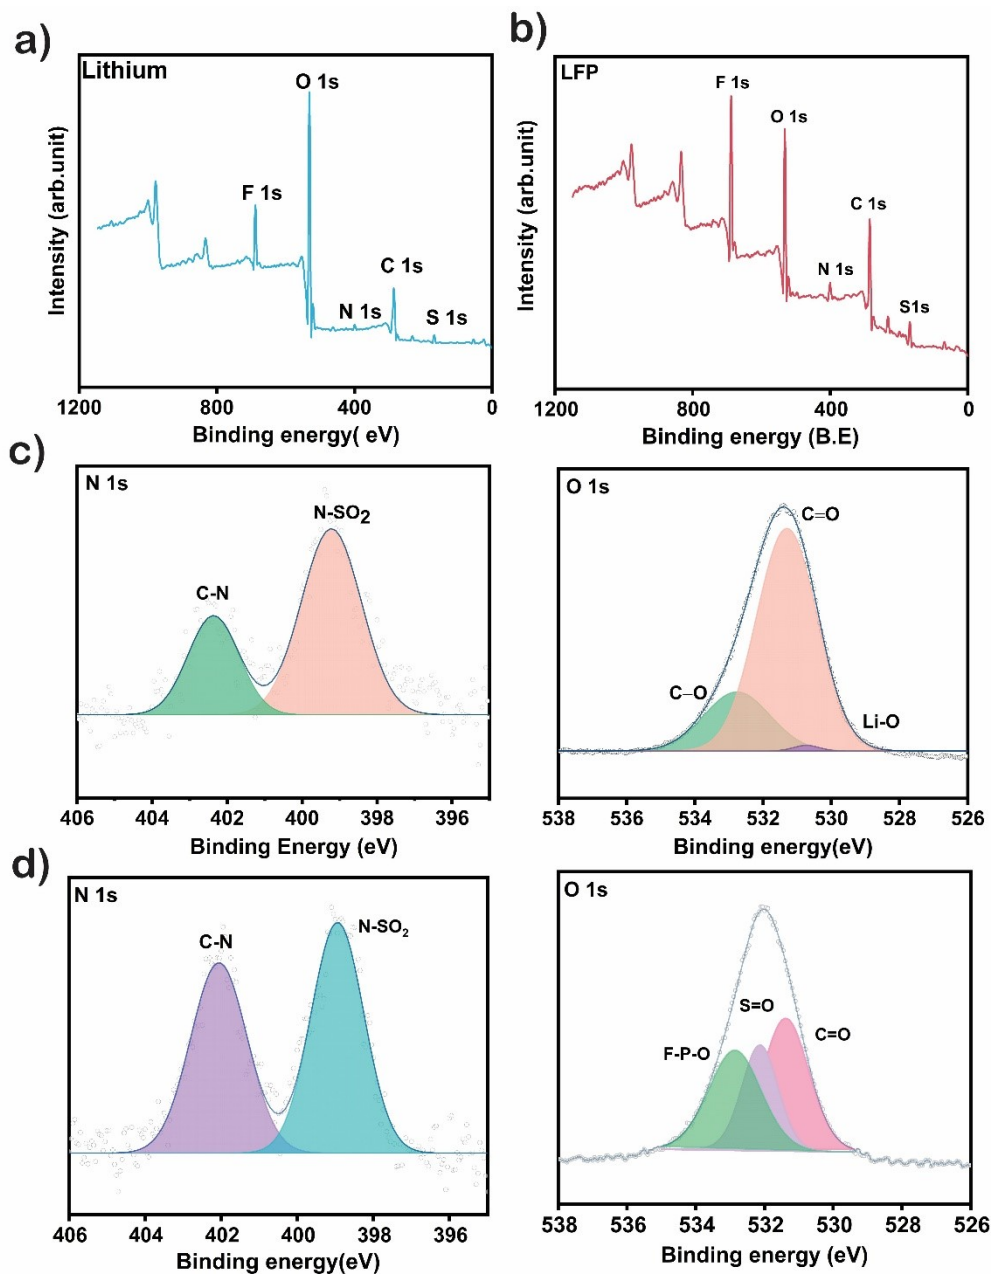

**Figure S9:** Post-mortem XPS spectra of a) Li anode and b) LFP cathode from LFP|DIL@SPE|Li cell after 100 cycles at 1C, c) N1s and O 1s peaks of lithium anode d) N1s and O 1s peaks of LFP cathode

**Table S3:** comparative literature data on the reported system

| Configuration                                                                                              | C-rate and corresponding specific capacity [mAh g <sup>-1</sup> ] |            |            |            |           | Number of cycles            | Reference Component |
|------------------------------------------------------------------------------------------------------------|-------------------------------------------------------------------|------------|------------|------------|-----------|-----------------------------|---------------------|
|                                                                                                            | 0.05C                                                             | 0.1C       | 0.2C       | 0.5C       | 1C        |                             |                     |
| Li/IPN-GPE/LiFePO <sub>4</sub>                                                                             | -                                                                 | 152.1      | 146        | 132        | 107.6     | 100 @ 1C RT                 | [1]                 |
| LFP/PIL-SPE-LiTFSI-40/Li                                                                                   | -                                                                 | 164.3      | 153.1      | 121.2      | 95.7      | 100@ 0.5C RT                | [2]                 |
| LFP 0.6 M LiTFSI/[C <sub>6</sub> (mim) <sub>2</sub> ][TFSI]2 Li                                            | 134                                                               | 133        | 113.3      | 73.6       | -         | 100@1C RT                   | [3]                 |
| LFP  Gel electrolyte  Li                                                                                   | 166                                                               | 164        | 164        | 143        | 128       | 130 @1C RT                  | [4]                 |
| LFP/PIL-LiTFSI-LATP/Li                                                                                     | -                                                                 | 163.2      | 160.2      | 152.5      | 138.4     | 250 @1C 60°C                | [5]                 |
| Li/NPE-V2/LiFePO <sub>4</sub>                                                                              |                                                                   | 158.2      | 152.6      | 141.5      | 119.4     | 100@0.1C &0.5C              | [6]                 |
| Li/P(PEGMA-VBImTFSI2)/LiTFSI/LiFePO <sub>4</sub>                                                           | -                                                                 | 142.2      | -          | -          | -         | 100 @0.1C 25°C              | [7]                 |
| LiFePO <sub>4</sub>  PIL-QSE Li                                                                            | 135                                                               | 128        | 116        | 104        | 97        | 100@ 0.1C 25°C              | [8]                 |
| Li/XP-20/LiFePO <sub>4</sub>                                                                               | -                                                                 | 168.2      | 160.3      | 134.1      | 70.0      | 150 @ 0.2C 25°C)            | [9]                 |
| LFP/GPE/Li                                                                                                 | -                                                                 | 150.04     | 151.02     | 141.44     | 132.02    | 200@0.5C                    | [10]                |
| Li/PILGPE@IL/LiFeO <sub>4</sub>                                                                            |                                                                   | 152        | 148        | 144        | 129       | 120@0.5C                    | [11]                |
| PIL. Li/LiFePO <sub>4</sub>                                                                                | -                                                                 | 153.7      | -          | -          | -         | 150@0.1C 25 °C.             | [12]                |
| Li  0.2M LiTFSI-[ME3AMIm] [TFSI]   LiFePO <sub>4</sub>                                                     | 98.5                                                              | 67.4       | 35.4       | -          | -         | 30@0.05C RT                 | [13]                |
| Li MPIEelectrolyte  LiFePO <sub>4</sub>                                                                    |                                                                   | 137.4      | 127        | 112.6      | 110       | 100@ 1C 25 °C               | [14]                |
| Li/IPN EM/LiFePO <sub>4</sub>                                                                              | 110                                                               | 85         | 82         | -          | 76        | 200@ 1C RT                  | [15]                |
| <b>✓ In this work, the electrochemical cycling tests were carried out for 500 cycles at 0.5 C &amp; 1C</b> |                                                                   |            |            |            |           |                             |                     |
| Li/DIL@SPE /LiFePO <sub>4</sub>                                                                            |                                                                   | <b>164</b> | <b>150</b> | <b>127</b> | <b>81</b> | <b>500@0.5C &amp; 1C RT</b> | <b>This Work</b>    |

## References

- 1) B. Huang, Y. Zhang, M. Que, Y. Xiao, Y. Jiang, K. Yuan and Y. Chen, *RSC Adv.*, 2017, **7**, 54391–54398.
- 2) F. Ma, Y. Liu, T. Huang, X. Du, Q. Lu and K. Kid, *Energy Convers. Manage.*, 2024, **22**, 100570.
- 3) T. Nirmale, N. Khupse, R. Kalubarme, M. Kulkarni, A. Varma and B. Kale, *ACS Sustainable Chem. Eng.*, 2022, **10**, 8297–8304.
- 4) S. More, R. Kale, P. Ambekar, N. Khupse, R. Kalubarme, M. Kulkarni and B. Kale, *ACS Appl. Polym. Mater.*, 2024, **6**, 11953–11963.
- 5) F. Ma, Z. Zhang, W. Yan, X. Ma, D. Sun, Y. Jin, X. Chen and K. He, *ACS Sustainable Chem. Eng.*, 2019, **7**, 4675–4683.
- 6) L. Dong, X. Zeng, J. Fu, L. Chen, J. Zhou, S. Dai and L. Shi, *Chem. Eng. J.*, 2021, **423**, 130209.
- 7) L. Chen, J. Fu, Q. Lu, L. Shi, M. Li, L. Dong, Y. Xu and R. Jia, *Chem. Eng. J.*, 2019, **378**, 122245.
- 8) T. Huang, M. Long, X. Wang, G. Wu and Y. Wang, *Chem. Eng. J.*, 2019, **375**, 122062.
- 9) Y. Tseng, S. Hsiang, C. Tsao, H. Teng, S. Hou and J. Jan, *J. Mater. Chem. A*, 2019, **9**, 5796–5806.
- 10) A. Kasimu, T. Hao, W. Ruan and M. Zhang, *J. Polym. Sci.*, 2025, **63**, 1140–1147.
- 11) H. Niu, M. Ding, N. Zhang, X. Li, X. Su, X. Han, P. Guan and X. Hu, *Mater. Chem. Phys.*, 2023, **293**, 126971.
- 12) Y. Sha, T. Yu, T. Dong, X. Wu, H. Tao and H. Zhang, *ACS Appl. Energy Mater.*, 2021, **4**, 14755–14765.
- 13) T. Nirmale, N. Khupse, R. Gore, J. Ambekar, M. Kulkarni, A. Varma and B. Kale, *ChemistrySelect*, 2018, **3**, 6255–6261.
- 14) Z. Zhang, Y. Zhang, B. Du and Z. Peng, *ACS Omega*, 2018, **3**, 10564–10571.
- 15) S. More, N. Khupse, J. Ambekar, M. Kulkarni and B. Kale, *Energy Fuels*, 2022, **36**, 4999–5008
